# Supplementary material for: Redox-mediated dissolution of paramagnetic nanolids to achieve a smart theranostic system
Source: Royal Society of Chemistry journal article supplement (doi:10.1039/c3nr05687b), 2014-01-01
Supplement: c3nr05687b1.pdf [file c3nr05687b1.pdf]

## Supplementary Information

### Redox-Mediated Dissolution of Paramagnetic Nanolids to Achieve Smart Theranostic System

*Aifei Wang<sup>a</sup>, Mingyi Guo<sup>a,e</sup>, Nan Wang<sup>c</sup>, Jianyun Zhao<sup>d</sup>, Wenxiu Qi<sup>d</sup>, Faheem  
Muhammad<sup>d</sup>, Liang Chen<sup>c</sup>, Yingjie Guo<sup>d</sup>, Nam-Trung Nguyen<sup>b</sup> and Guangshan  
Zhu<sup>\*a,b</sup>*

<sup>a</sup> State Key Laboratory of Inorganic Synthesis and Preparative Chemistry, College of Chemistry, Jilin University. <sup>b</sup> Queensland Micro- and Nanotechnology Centre, Griffith University, Nathan QLD 4111, Australia. <sup>c</sup> Radiology Department, The First Hospital of Jilin University. <sup>d</sup> College of Life Science, Jilin University. <sup>e</sup> College of Construction Engineering, Jilin University.

\*E-mail: zhugs@jlu.edu.cn

**Materials and instrumentation:** Cetyltrimethylammonium bromide (CTAB), tetraethylorthosilicate (TEOS), 3-Aminopropyltriethoxysilane (APTES), 1-(3-(dimethylamino)propyl)-3-ethylcarbodiimide hydrochloride (EDC·HCl), Camptothecin (CPT), Glutathione (GSH) and Dithiothreitol (DTT) were purchased from Aladdin Reagent Company. 3-[4,5-dimethylthiazol-2-yl]-2,5-diphenyltetrazolium bromide (MTT) was purchased from Sigma-Aldrich.

The morphologies and detailed structure of the samples were recorded using JEOL JSM-6700F field-emission scanning electron microscope (SEM) and FEI Tecnai G2 F20 S-TWIN transmission electron microscope (TEM). The powder XRD patterns were recorded on a Rigaku D/Ma 2550 X-ray diffractometer with Cu-K $\alpha$  radiation ( $\lambda = 1.5418 \text{ \AA}$ ). Fourier transform infrared (FTIR) spectra were collected on a Nicolet Impact 410 FTIR spectrometer in the range of 400 - 4000  $\text{cm}^{-1}$ . Elemental analysis was carried out on Perkin-Elmer ICP-OES Optima 3300DV. X-ray photoelectron spectroscopy (XPS) was performed using an ESCALAB 250 spectrometer. Raman spectra were obtained with a Renishaw Raman system model 1000 spectrometer.

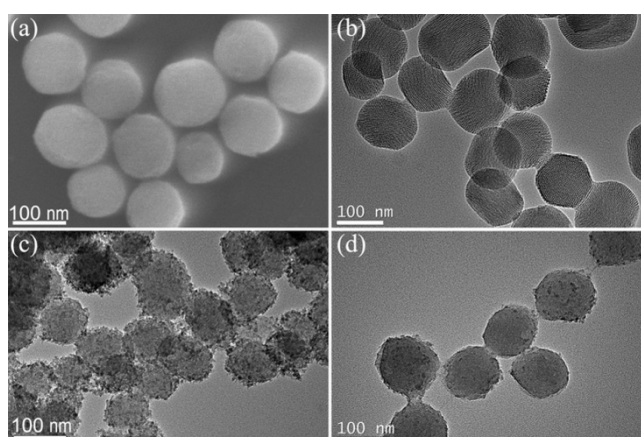

**Fig. S1** (a) SEM and (b) TEM micrographs of MSNPs. (c) and (d) TEM micrographs of  $\text{Mn}_3\text{O}_4$ @MSNPs obtained after incubation in 10 mM and 20 mM DTT solutions, showing the dissolution of the  $\text{Mn}_3\text{O}_4$  nanocrystals.

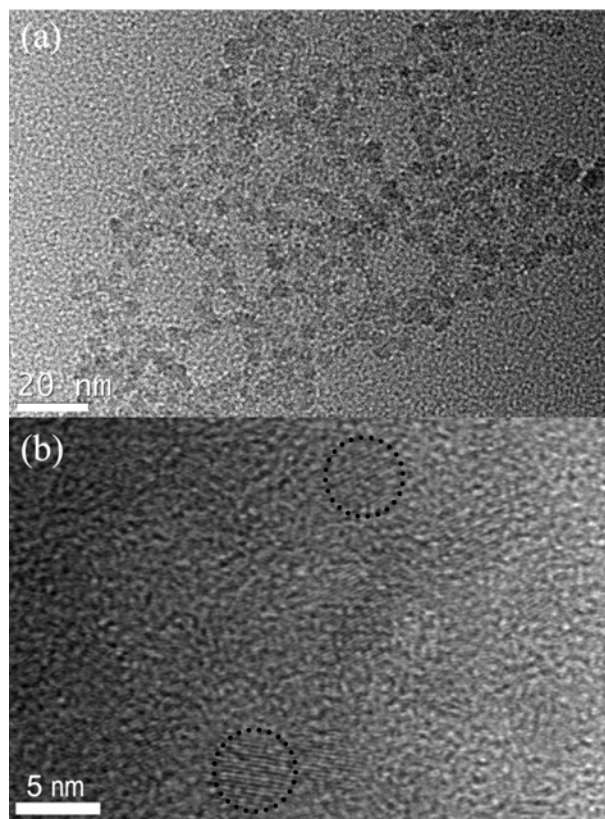

**Fig. S2** (a) TEM, (b) HRTEM images of  $Mn_3O_4$  nanocrystals.

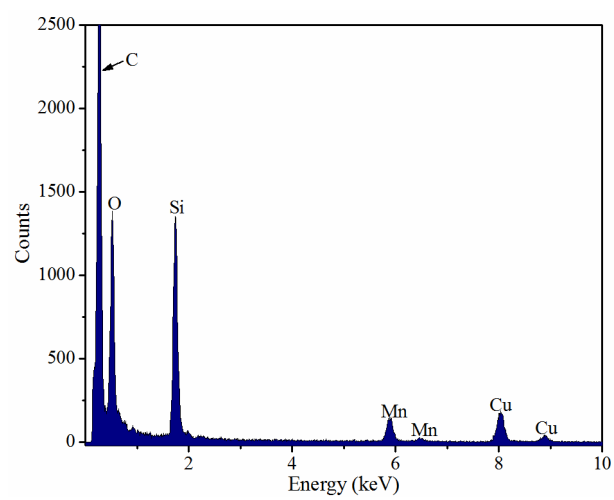

**Fig. S3** EDX spectrum of  $Mn_3O_4@MSNPs$ .

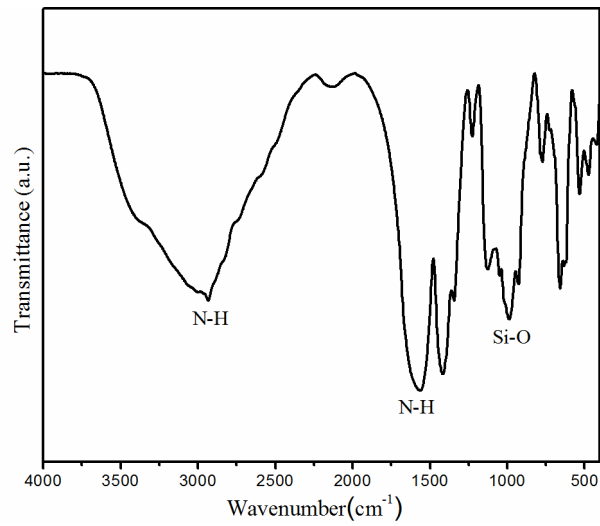

**Fig. S4** FTIR spectra of Mn<sub>3</sub>O<sub>4</sub> nanocrystals.

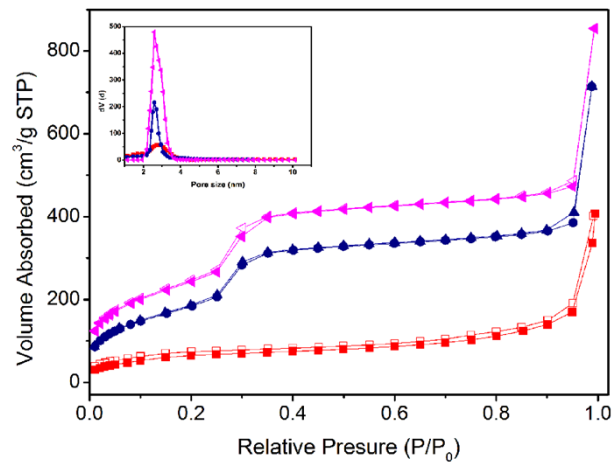

**Fig. S5** Nitrogen adsorption–desorption isotherms for (a) MSN functionalized with carboxyl groups (pink), (b) MSN@CPT (blue), (c) Mn<sub>3</sub>O<sub>4</sub>@MSN@CPT (red). (Inset: corresponding pore size distribution curve from adsorption branch).
